# Supplementary material for: Highly stable Au/Pd@mesoporous SiO2 yolk–shell hetero-nanostructures for plasmon-enhanced visible light driven catalytic reactions
Source: Royal Society of Chemistry journal article supplement (doi:10.1039/c6nj02990f), 2016-12-12
Supplement: c6nj02990f1.pdf [file c6nj02990f1.pdf]

## New Journal of Chemistry

Highly stable Au/Pd @mesoporous SiO<sub>2</sub> yolk-shell hetero-nanostructures  
for plasmon-enhanced visible light driven catalytic reaction

Yajing Mu, Haiyan Zhang\*, Weitao Zheng, Xiaoqiang Cui\*

Department of Materials Science, Key Laboratory of Automobile Materials of MOE  
and State Key Laboratory of Automotive Simulation and Control, Jilin University,  
Changchun, 130012, (People's Republic of China)

\*Corresponding authors: E-mail address: xqcui@jlu.edu.cn (X. Cui),  
haiyanzhang@jlu.edu.cn (H. Zhang)

Tel & Fax: +86-431-85155279

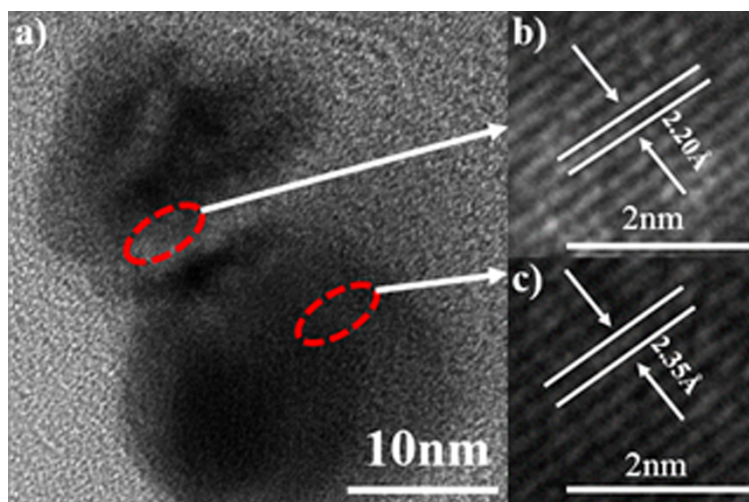

**Figure S1.** (a) High resolution TEM images of Au/Pd@m-SiO<sub>2</sub> yolk-shell particle, (b) and (c) enlarge image of the square region in (a).

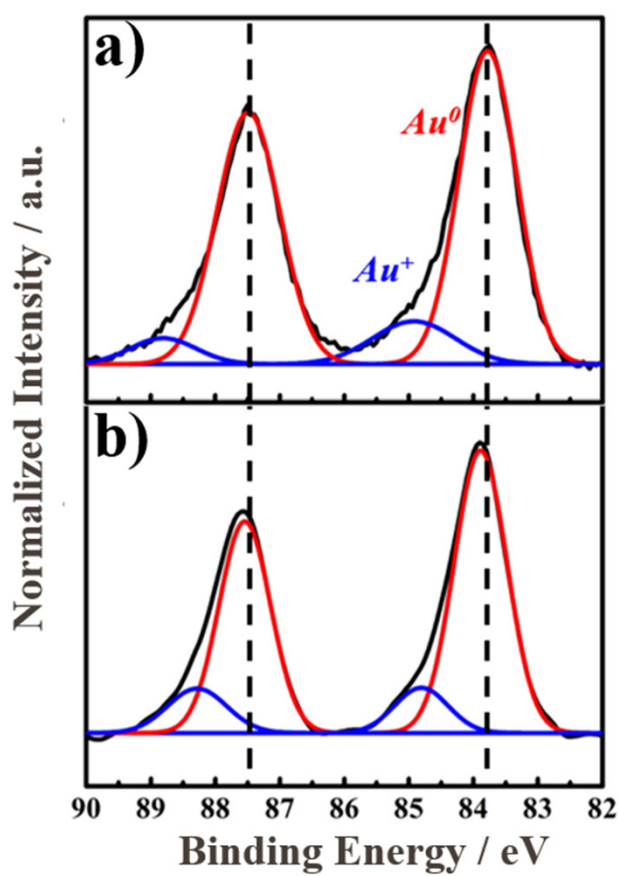

**Figure S2.** The XPS spectra of Au 4f of Au@m-SiO<sub>2</sub> and Au/Pd@m-SiO<sub>2</sub>.

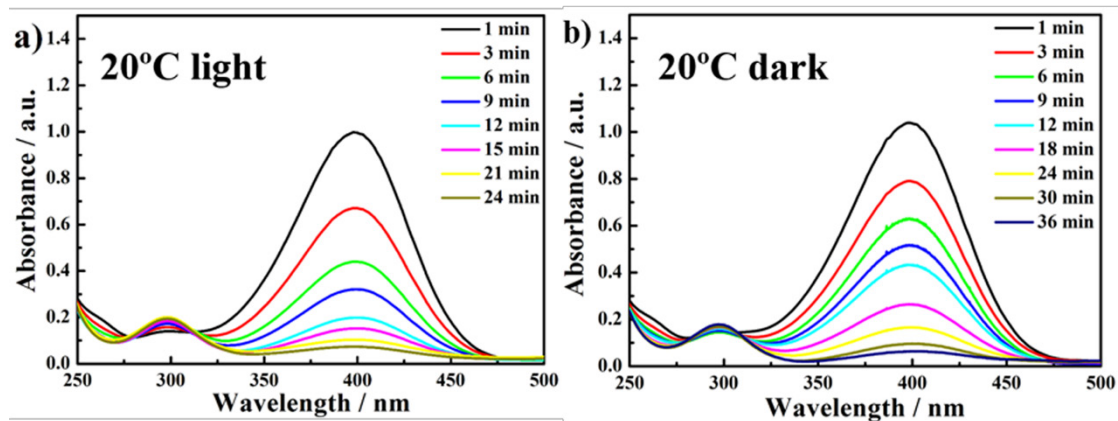

**Figure S3.** Time dependent UV-vis absorption spectra of the reduction of 4-nitrophenol by  $\text{NaBH}_4$  in the presence of  $\text{Au/Pd@m-SiO}_2$  yolk shell NPs at  $5^\circ\text{C}$ .

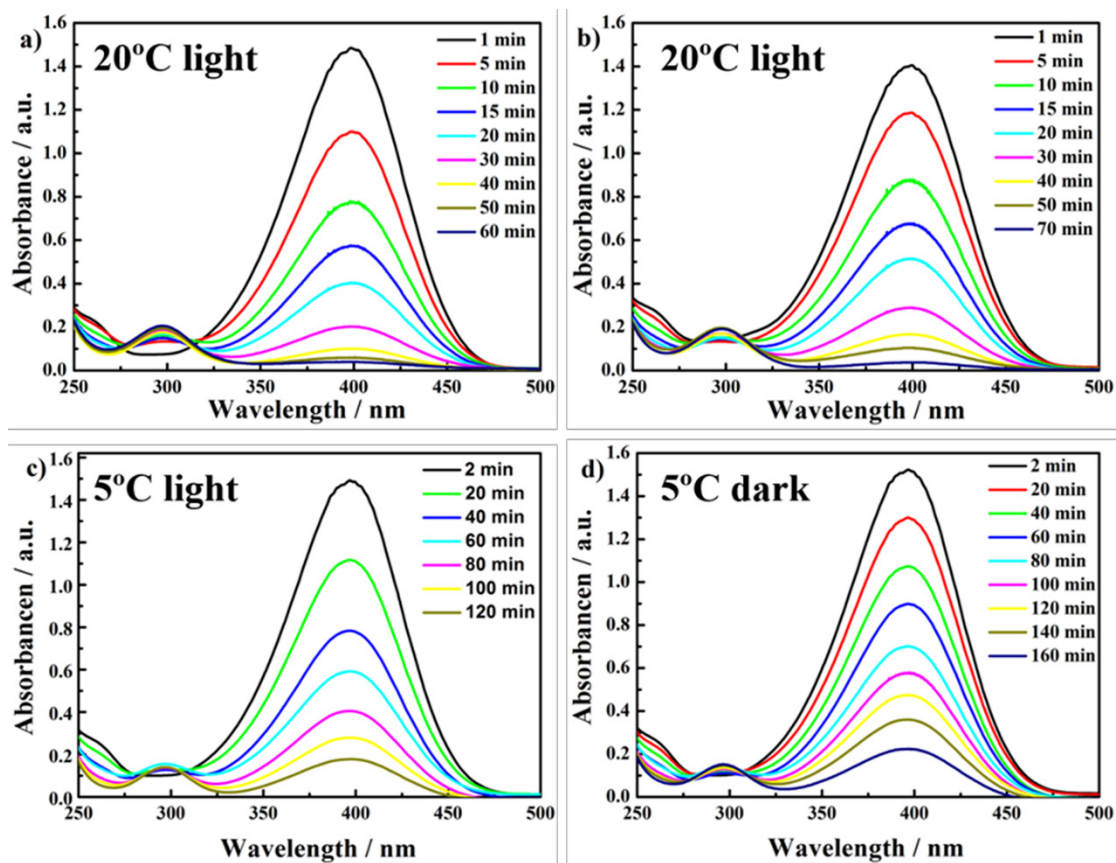

**Figure S4.** Time dependent UV-vis absorption spectra of the reduction of 4-nitrophenol by  $\text{NaBH}_4$  in the presence of  $\text{Au@m-SiO}_2$  yolk-shell NPs at various conditions.

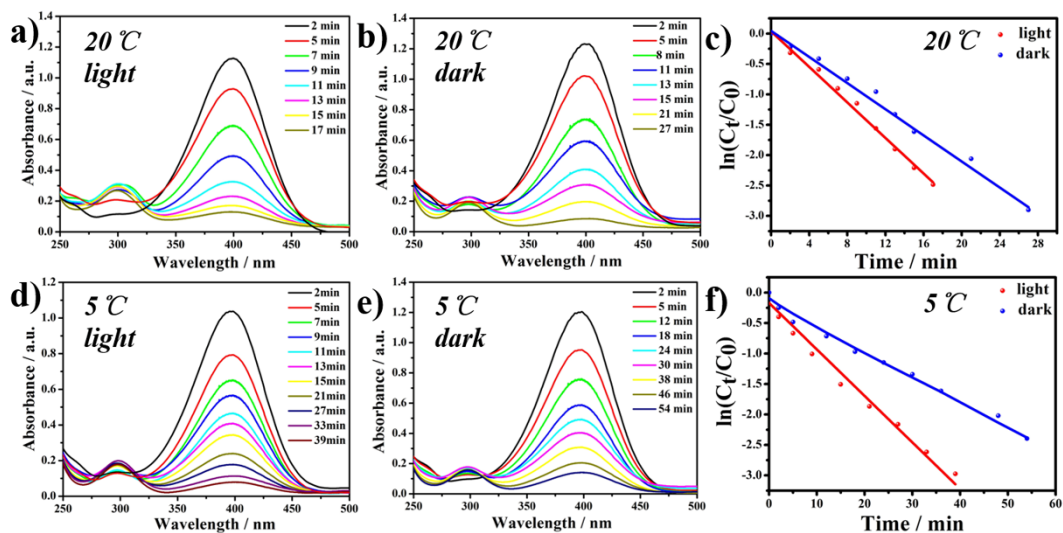

**Figure S5.** Time dependent UV-vis absorption spectra and Kinetic linear fitting curves for the reduction of 4-NP by  $\text{NaBH}_4$  in the presence of Au/Pd without  $\text{m-SiO}_2$  NPs at various conditions.

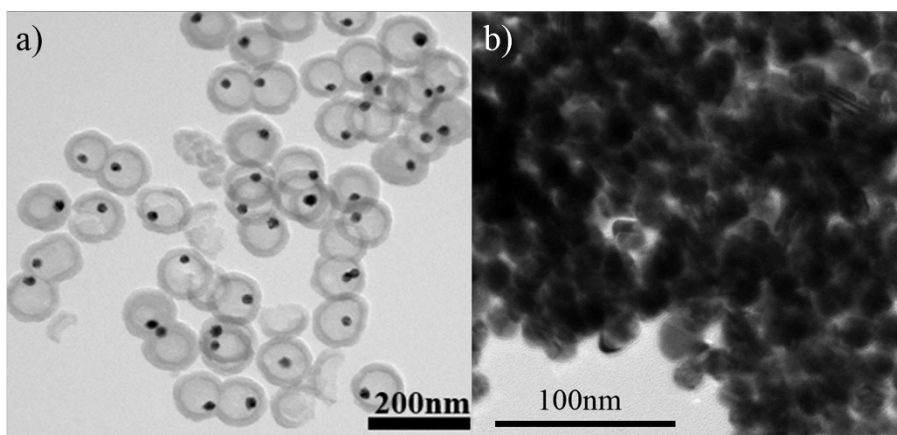

**Figure S6.** TEM images of a) Au/Pd@m-SiO<sub>2</sub> yolk-shell NPs after 10 cycles and b) Au/Pd without m-SiO<sub>2</sub> after 3 cycles.
